# Supplementary material
Source: Springer Nature journal article supplement (https://www.springermedizin.de/resource/supplementary/12936_2009_1089_MOESM7_ESM.pdf/9550014)
Supplement: MOESM7 [file 9550014]

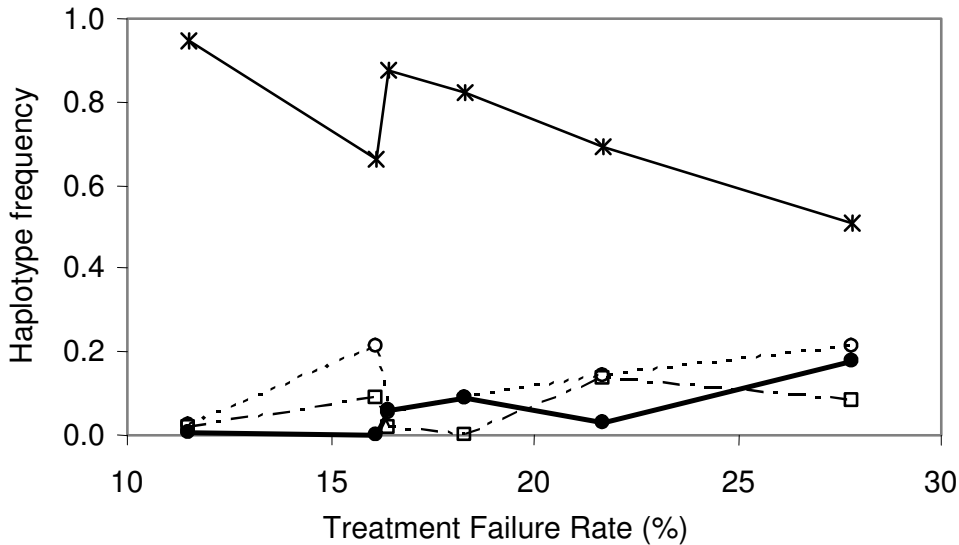

---○--- Wild type

- -□- - Single mutation *pfdhfrS108N*

—\*— Double (*pfdhfrC59R pfdhfrS108N*)

—●— Triple mutant (*pfdhfrC59R pfdhfrS108N pfdhpsA437G*)
